# Supplementary material for: Determination of microRNA-122 in hepatocytes by two-step amplification of duplex-specific nuclease with laser-induced fluorescence detection
Source: Royal Society of Chemistry journal article supplement (doi:10.1039/d2ay00360k), 2022-01-01
Supplement: d2ay00360k1.pdf [file d2ay00360k1.pdf]

## Electronic Supplementary Information

### Determination of microRNA-122 in hepatocytes by two-step amplification of duplex-specific nuclease with laser-induced fluorescence detection

Xiufeng Yu · Shaoyan Zhang · Wei Wang\*

Ministry of Education Key Laboratory for Analytical Science of Food Safety and Biology, and Fujian Provincial Key Laboratory of Analysis and Detection Technology for Food Safety, School of Chemistry, Fuzhou University, Fuzhou, 350116, P. R. China

**Table S1 Oligonucleotide sequences**

| Nucleic acids        | Sequence (5' to 3')                              |
|----------------------|--------------------------------------------------|
| Probe 1              | FAM-CAAACACCATTGTCACACTCCATATTCTTCAGGTGTTTG-BHQ1 |
| Probe 2              | FAM-CCTGGTCAAACACCTGAAGAATAACCAGG-BHQ1           |
| MiR-122              | UGGAGUGUGACAAUGGUGUUUG                           |
| MiR-122 (mismatch 1) | UGGAGUGUGAU <u>AA</u> UGGUGUUUG                  |
| MiR-122 (mismatch 3) | UGGAGU <u>CUGA</u> <u>UAAU</u> <u>AG</u> UGUUUG  |
| MiR-21               | UAGCUUAUCAGACUGAUGUUGA                           |

Underlined parts were the mismatched bases

**Table S2 Repeatability**

| Repeatability | Fluorescence increment (mV) |        |        |        |        |        |        |        |        |        | RSD     |
|---------------|-----------------------------|--------|--------|--------|--------|--------|--------|--------|--------|--------|---------|
|               |                             |        |        |        |        |        |        |        |        |        | (n = 9) |
| Intraday      | 255.67                      | 282.36 | 272.52 | 268.68 | 267.14 | 267.91 | 276.01 | 268.69 | 267.18 | 269.18 | 2.69%   |
| Interday      | 269.36                      | 264.11 | 289.95 | 252.95 | 267.14 | 279.43 | 280.19 | 260.11 | 276.01 | 276.01 | 4.23%   |

**Table S3 Recoveries**

| Cells         | Analytes | Added amount<br>(M)    | Found amount<br>(M)    | Recoveries<br>(%) | RSD<br>(n = 3) |
|---------------|----------|------------------------|------------------------|-------------------|----------------|
| Chicken liver | miR-122  | $4.50 \times 10^{-10}$ | $5.06 \times 10^{-10}$ | 112.4%            | 6.08%          |
| Duck liver    | miR-122  | $9.50 \times 10^{-10}$ | $9.19 \times 10^{-10}$ | 95.68%            | 5.95%          |

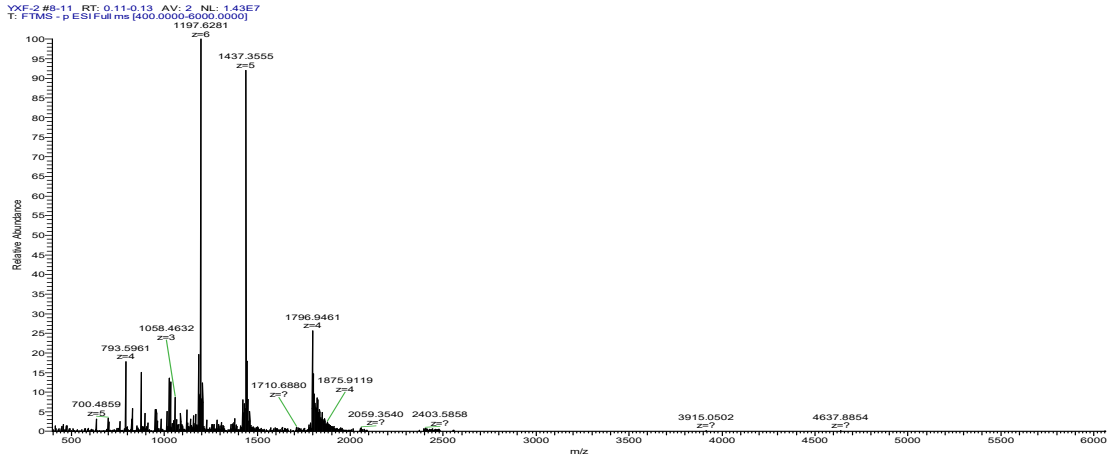

A

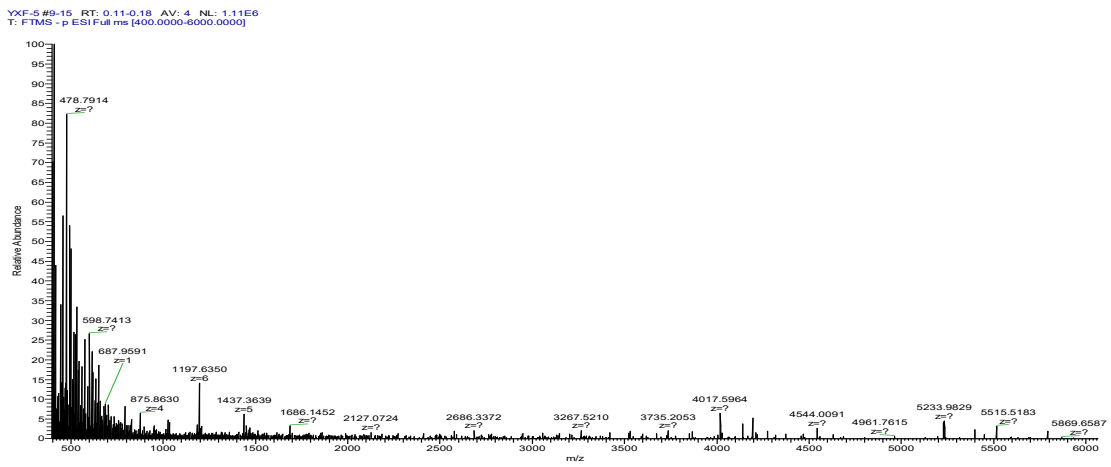

B

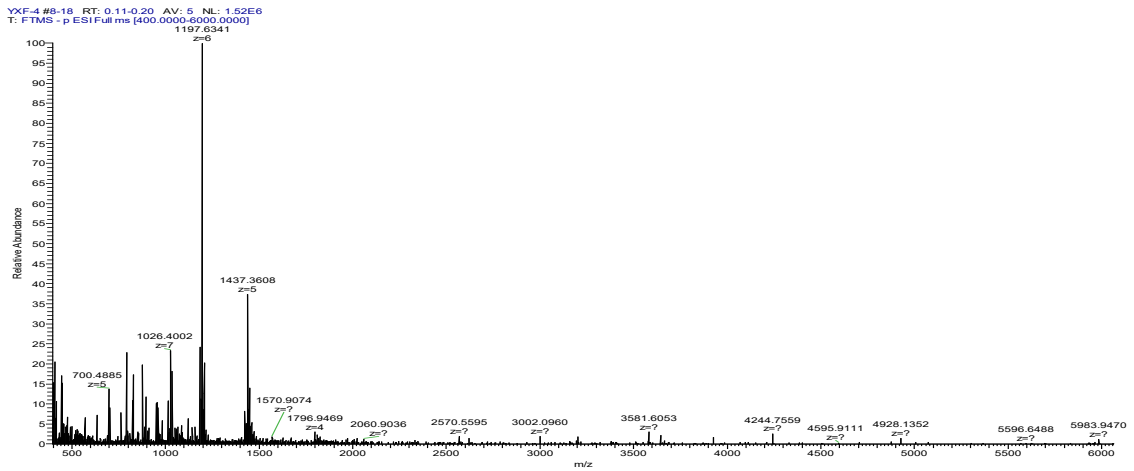

C

Fig. S1 MS spectrograms of miR-122 and samples  
A, MS spectrogram for miR-122 (50ppm); B, MS spectrogram of the sample of chicken liver; C, MS spectrogram of the sample of duck liver
